# Supplementary material
Source: PubMed Central journal article supplement (PMC10630072)
Supplement: NIHMS1934777-supplement-6.pdf [file NIHMS1934777-supplement-6.pdf]

## Supplementary Figure and Figure Legend

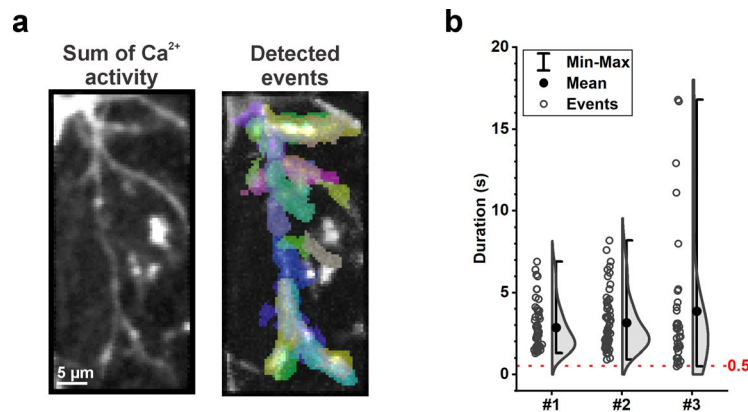

**Supplementary Figure 1. OPC  $\text{Ca}^{2+}$  events last a minimum of 0.5 seconds.** **a**, Images indicating summed fluorescence (left) and AQuA detected events (right) of  $\text{Ca}^{2+}$  events in OPC processes recorded at 10 Hz. **b**, Distribution and quantification of  $\text{Ca}^{2+}$  event duration, detected using 20 Hz (animal #1, 52 events from 1 OPC) or 10 Hz (animal #2, 61 events from 1 OPC, and animal #3, 35 events from 1 OPC) of 2P Ti:Sapphire lasers at 920 nm. Note that every event detected is at least equal to or longer than 0.5 s. Data collection from animal #1, #2 and #3 were performed independently.

## **Supplementary Video Legends**

**Supplementary Video 1. Cytosolic OPC Ca<sup>2+</sup> activity in the visual cortex *in vivo*.** Left: OPC Ca<sup>2+</sup> activity detected by 2P microscopy; Right: Output video from AQuA with randomly-pseudocolored Ca<sup>2+</sup> events (5x speed).

**Supplementary Video 2. Membrane OPC Ca<sup>2+</sup> activity in the visual cortex *in vivo*.** Left: OPC Ca<sup>2+</sup> activity detected by 2P microscopy; Right: Output video from AQuA with randomly-pseudocolored Ca<sup>2+</sup> events (5x speed).

**Supplementary Video 3. Enforced locomotion stimulates OPC Ca<sup>2+</sup> activity in the mouse visual cortex.** The red dot indicates when the platter began to rotate (movie played at 5x speed).

**Supplementary Video 4. PE evokes Ca<sup>2+</sup> influx in OPCs in acute cortical slices.** PE was superfused ~3 min after the recording begins (movie shown at 50x speed).

**Supplementary Video 5. Myelinating oligodendrocytes exhibit infrequent Ca<sup>2+</sup> activity in the visual cortex *in vivo*.** Left: Oligodendrocyte near membrane Ca<sup>2+</sup> activity detected by 2P microscopy; Right: Output video from AQuA with randomly-pseudocolored Ca<sup>2+</sup> events (5x speed).
